1 **Title**

2

3 Delayed recovery and host specialization may spell disaster for coral-fish mutualism

4

5 **Keywords**

6

7 Mutualism; habitat specificity; host plasticity; multiple disturbances; coral-dwelling

8 gobies; mutual symbioses

9

10 **Authors**

11

12 Catheline Y.M. Froehlich, O. Selma Klanten, Martin L. Hing, Mark Downton, and Marian

13 Y.L. Wong

14

15 **Abstract**

16

17 Mutualisms are prevalent in many ecosystems, yet little is known about how symbioses  
18 are affected by multiple disturbances. Here we show delayed recovery for 13 coral-  
19 dwelling goby fishes (genus *Gobiodon*) compared with their host *Acropora* corals  
20 following 4 consecutive cyclones and heatwaves. While corals became twice as  
21 abundant 3 years post-disturbances, their symbiotic gobies were only half as abundant  
22 relative to pre-disturbances and half of the goby species disappeared. Although goby  
23 species preferred particular coral species, surviving goby species shifted hosts to newly  
24 abundant coral species when their preferred hosts became rare. As host specialization is  
25 key for goby fitness, shifting hosts may have negative fitness consequences for gobies  
26 and corals alike and affect their survival in response to environmental changes. Our  
27 study demonstrates that mutualist partners do not respond identically to multiple  
28 disturbances, and that goby host plasticity, while potentially detrimental, may be the  
29 only possibility for early recovery.

30

31 **MAIN TEXT**

32

33 **Introduction**

34

35 In the face of climate change, multiple consecutive disturbances are becoming  
36 increasingly prevalent globally, and ecosystem stability is being threatened as a  
37 result<sup>1,2</sup>. Relationships between organisms are important for maintaining ecosystem  
38 balance and diversity during these challenging times, especially when one of these  
39 organisms is a habitat-forming foundation species, e.g. conifers, kelps, and corals<sup>3,4</sup>.  
40 Mutually beneficial symbioses (here termed 'mutualisms') often promote the survival of  
41 foundation and partner species, but anthropogenic disturbances are adding extreme  
42 pressures on these relationships<sup>4,5</sup>. A key question to arise is: will organisms in  
43 mutualisms respond similarly to consecutive disturbances, and what factors are  
44 important in the persistence of both partners<sup>6</sup>?

45

46 For symbioses in which one organism relies on the other for limiting resources like food  
47 and shelter, the host species is a key determinant of the fitness of its symbiotic partner  
48 (mediated through growth, feeding, and reproductive advantages)<sup>7,8</sup>. The benefits that  
49 the host incurs from their symbiotic partner may also vary with the species of the  
50 partner, e.g. specialized nutrients and protection<sup>9-11</sup>. However, as disturbances are  
51 intensifying and occurring more frequently, some host species are being

52 disproportionately affected than other hosts<sup>9,10,12</sup>. In response, symbiotic partners may  
53 leave their host if it becomes unhealthy<sup>11,13</sup>, or they may stay and facilitate their mutual  
54 recovery<sup>6,10,14</sup>.

55  
56 On coral reefs, corals are host to many mutually symbiotic organisms, such as microbes,  
57 *Symbiodinium* algae, crabs and coral-dwelling fishes<sup>15-17</sup>. These symbiotic partners often  
58 specialize on particular host coral species, which they may leave or stay during  
59 environmental stress<sup>12,15-17</sup>. Little is known about how climate change affects these  
60 mutualisms and the degree of host specialization by symbiotic partners, despite the  
61 importance of these ecological partnerships. For example, coral-fish symbioses are  
62 important for coral health because fish protect corals from toxic algae, sedimentation,  
63 predation, and stagnant hot water build-up<sup>14,18-20</sup>. Often, coral-dwelling fishes specialize  
64 on different hosts and vary to what extent they are specialized: some only live in 1-3  
65 species (host specialist), while others use 4-11 coral species (host generalist)<sup>7,12,21</sup>. Host  
66 specialization by coral-dwelling fishes likely affects how both symbiotic partners  
67 recover given that climatic disturbances affect some hosts more than others<sup>22,23</sup>.

68  
69 Here, our 7-year study (2013-2020) shows that coral-dwelling gobies (genus *Gobiodon*)  
70 either disappeared or shifted their occupation of host corals (genus *Acropora*) after an  
71 unprecedented succession of disturbances with limited recovery periods: 2 category 4  
72 cyclones (2014, 2015) and 2 prolonged heatwaves (2016, 2017) which caused extensive  
73 coral bleaching. By surveying gobies and their coral hosts before and after each  
74 disturbance, and then 3 years post-disturbances, we found that gobies fared far worse  
75 than corals, with a distinct time lag in the early signs of recovery of gobies compared to  
76 corals<sup>23</sup>. Previous studies have shown trade-offs between goby fitness and host  
77 specificity, with particular coral hosts improving growth and survival of specialist  
78 gobies compared to generalist gobies<sup>7,21</sup>. Accordingly, the shifts in host occupation  
79 coupled with a lag in recovery of gobies will likely hamper fitness of both parties during  
80 the crucial and early stages following disturbances<sup>14,18-20,24</sup>.

## 81 82 **Results**

### 83 84 *Goby Recovery is Lagging Behind the Recovery of their Coral Hosts*

85  
86 Throughout these consecutive disturbances and 3 years post-disturbances, we surveyed  
87 36 species of *Acropora* coral hosts used by 13 species of coral-dwelling gobies  
88 (*Gobiodon*) known to occur at Lizard Island, Great Barrier Reef, Australia (-14.687264,  
89 145.447039, Suppl. Fig 1, Fig 1A). Less than one year after the last disturbance (2018),  
90 coral and goby abundances, richness, coral diameter and occupancy, and goby group  
91 size were at an all-time low (Suppl. Fig 2,  $p < 0.001$ , see Supplementary Table 1 for all  
92 statistical results). Three years post-disturbances (2020), there were signs of recovery  
93 for corals as coral abundance and richness were higher than previously recorded, but  
94 coral diameter remained extremely small and corals were rarely occupied by gobies  
95 (Suppl. Fig 2). Goby richness and abundances were still very low, and gobies continued  
96 to occur singly (Suppl. Fig 2). However, the number of juvenile goby species and their  
97 abundance improved (Suppl. Fig 2).

98  
99 We focused specifically on the abundance of the 10 most commonly used coral hosts  
100 and 10 most common goby species, and found that not all goby and coral species  
101 responded in the same way. Abundances were different among years ( $p < 0.001$ , Fig  
102 1B), with eight coral species becoming extremely rare after disturbances, which was not

103 surprising because 50% of the transects lacked corals compared to only 5% before  
 104 disturbances<sup>23</sup>. However there was recovery 3 years post-disturbances when only 17%  
 105 of transects lacked corals. Surprisingly, two coral species became more abundant  
 106 immediately after disturbances even though they were rare before (*A. cerealis* and *A.*  
 107 *selago*). These species became at least 10 times more abundant 3 years post-  
 108 disturbances than pre-disturbances (Fig 1B). In general, more corals were found  
 109 without goby partners post- compared to pre-disturbances (Fig 1B).

110

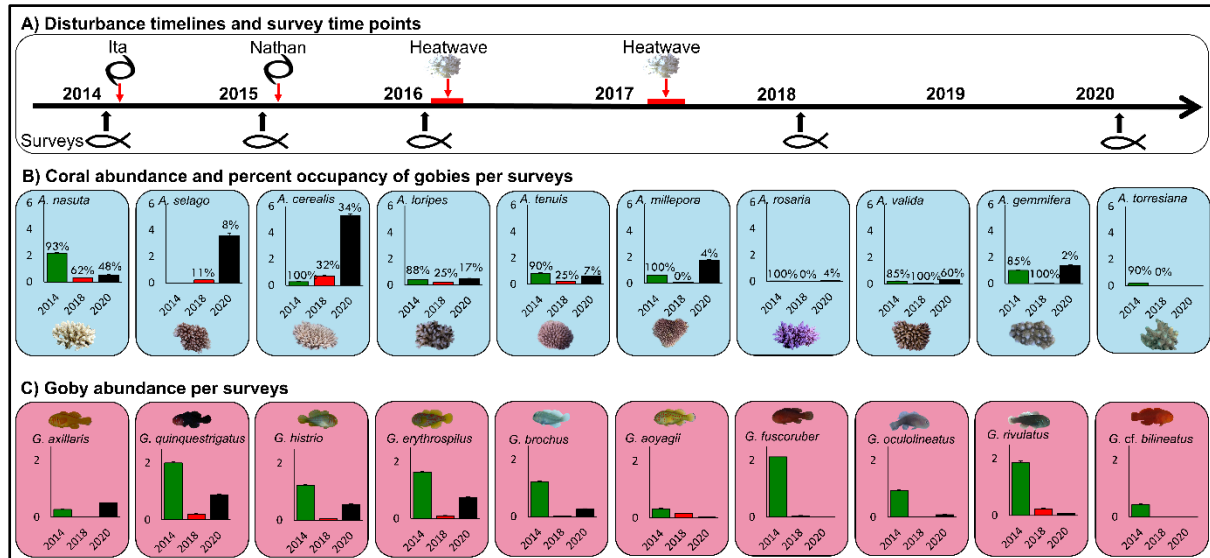

111

112

**Fig 1. Multiple disturbances changed the mean abundance per transect of**

***Acropora* corals (blue) and their symbiotic *Gobiodon* gobies (red).** A) Following  
 114 consecutive disturbances (2 cyclones and 2 heatwaves), B) the 10 most common coral  
 115 hosts and C) their goby symbionts experienced drastic changes in abundances.

116 Abundances after each cyclone were not significant but were significant after the last  
 117 disturbances, and thus we display changes post-disturbances. Error bars are standard  
 118 error. Percentages above bars represent the proportion of corals that were occupied by  
 119 gobies during that particular survey year.

120

121 For gobies though, it was a different story. Several species were still absent three years  
 122 post-disturbances (2020) (Fig 1C). Three species disappeared altogether from our  
 123 survey sites immediately after disturbances (*G. cf. bilineatus*, *G. fuscoruber*, and *G.*  
 124 *oculolineatus*), and an additional two species (*G. aoyagii*, and *G. rivulatus*) disappeared 3  
 125 years post-disturbances (Fig 1C). Of those species that disappeared, three were already  
 126 rare before disturbances, but one was originally the most common species surveyed (*G.*  
 127 *fuscoruber*). Only one goby (*G. axillaris*) returned to its pre-disturbance abundance in  
 128 2020 i.e. had fully recovered, while the remaining half that were still observed were still  
 129 at 50% pre-disturbance abundances (Fig 1C).

130

### 131 *Some Gobies Showed Plasticity in their Host Specificity*

132

133 Pre-disturbances, each goby species usually inhabited a range of coral species with  
 134 minimal overlap among goby species ( $p < 0.01$ ), but this variation in host specificity was  
 135 affected by the climatic disturbances ( $p < 0.01$ , Suppl. Fig 3, Fig 2). Not all gobies  
 136 responded the same in terms of host occupation throughout the disturbances ( $p < 0.01$ ;  
 137 Fig 2), although there were no marked differences in particular coral species occupied  
 138 by host specialists versus host generalists ( $p > 0.50$ ; Fig 2).

139

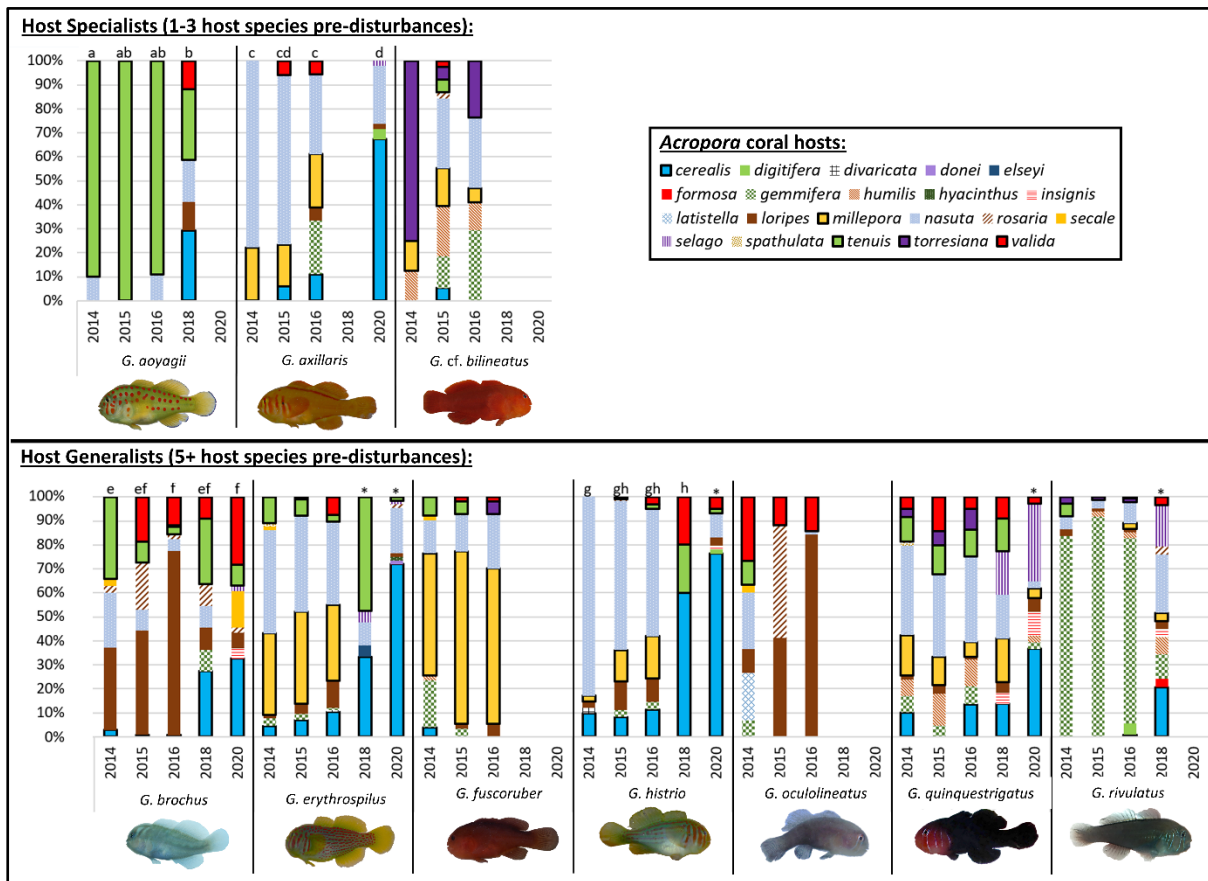

140  
 141 **Fig 2. Host specificity of *Gobiodon* gobies in *Acropora* coral hosts changed**  
 142 **following multiple disturbances.** Proportion of all *Acropora* species used by the 10  
 143 most common *Gobiodon* species from surveys: pre-disturbances (2014), after cyclone  
 144 Ita (2015), after cyclone Nathan (2016), after two back-to-back heatwaves/bleaching  
 145 events (2018), and 3 years post-disturbances (2020). Letters above each bar represent  
 146 host use differences among sampling years that are significantly similar to one another  
 147 within species, and asterisks represent host occupation that is significantly different  
 148 from all others within a species.

149  
 150 Host specialists, i.e. *G. aoyagii*, *G. axillaris*, and *G. cf. bilineatus*, occupied 1-3 host species  
 151 pre-disturbances but each species occupied their own range of host species (Fig 2).  
 152 Cyclones had minimal effects on host occupation, but there were marked changes after  
 153 heatwaves. Post-disturbances, host specialists either disappeared or occupied more  
 154 host species than previously observed (Fig 2). Of the three host specialists, *G. aoyagii*  
 155 was the only species that was present after disturbances (2018) but it switched to being  
 156 a host generalist occupying 5 coral species. Three years post-disturbances, *G. aoyagii*  
 157 disappeared, but *G. axillaris* was observed once again and was a generalist occupying 5  
 158 coral species.

159  
 160 The other seven goby species were host generalists inhabiting between 5 to 10 coral  
 161 host species pre-disturbances (Fig 2). Cyclones had minimal effect on host occupation,  
 162 but heatwaves again caused noticeable changes. Post-disturbances, out of the seven  
 163 host generalists, 5 goby species were still present and all but *G. histrio* remained host  
 164 generalists, although *G. histrio* was only observed 10 times (Fig 2). Even three-years  
 165 post disturbances, generalists continued occupying a wide range of hosts, including *G.*  
 166 *histrio* again, although another generalist *G. rivulatus* had disappeared (Fig 2).

167

168 To index host specificity along a continuum instead of finite categories (host specialist  
 169 vs. generalist), we calculated the proportion of occurrences that a goby species only  
 170 occupied one coral species. We found that this index affected the range of hosts  
 171 occupied throughout disturbances ( $p < 0.01$ ); i.e., goby species that tended to occupy  
 172 only one coral species occupied different coral species to goby species that tended to  
 173 occupy several coral species. However, each goby species preferred a single particular  
 174 coral species over others (Fig 3). In particular, gobies occupied a particular host  
 175 between 35-90% of the time, although host specialists tended to occupy one host  
 176 species more often than host generalists. For host specialists, 90% of *G. aoyagii*  
 177 occupied *A. tenuis*, 75% of *G. axillaris* occupied *A. nasuta*, and 75% *G. cf. bilineatus*  
 178 occupied *A. torresiana* (Fig 2,3). For host generalists, 30% of *G. brochus* occupied *A.*  
 179 *loripes* and 30% occupied *A. tenuis*, 40% of *G. erythrospilus* occupied *A. nasuta*, 50% of *G.*  
 180 *fuscoruber* occupied *A. millepora*, 80% of *G. histrio* occupied *A. nasuta*, 25% of *G.*  
 181 *oculolineatus* occupied *A. valida*, 35% of *G. quinquestrigatus* occupied *A. nasuta*, and 80%  
 182 of *G. rivulatus* occupied *A. gemmifera* (Fig 2,3). Therefore, *A. nasuta* was the preferred  
 183 host for four goby species, whether they were host specialists or generalists (Fig 3).  
 184

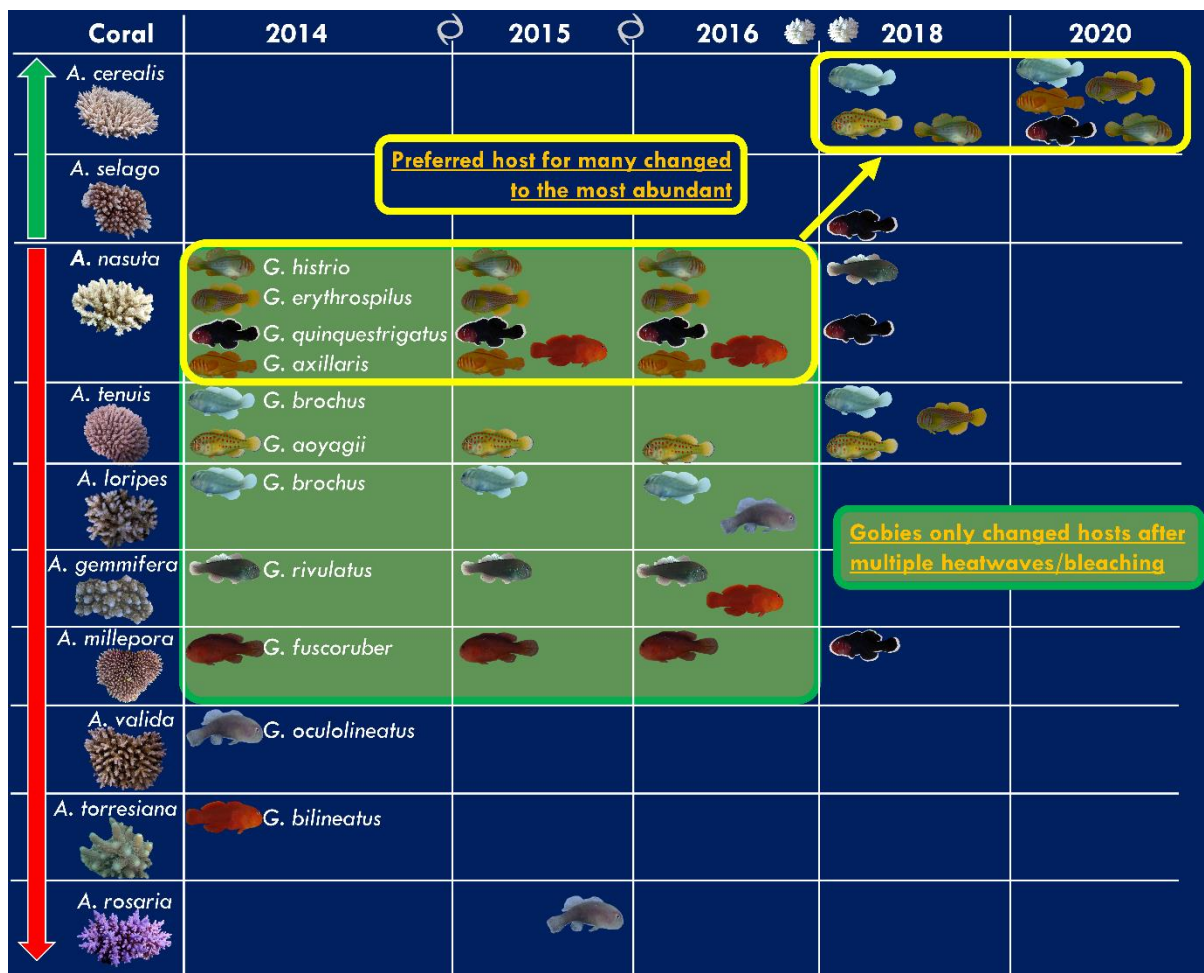

185  
 186 **Fig 3. Changes in preferred *Acropora* host(s) for each *Gobiodon* gobies following**  
 187 **multiple disturbances.** Completed surveys before disturbance (2014), after cyclone Ita  
 188 (2015), after cyclone Nathan (2016), after two back-to-back heatwaves (2018), and 3  
 189 years post-disturbances (2020). Coral hosts are organized from top to bottom to  
 190 illustrate changes from most abundant to least abundant corals after disturbances.  
 191 Green arrow highlights coral species that increased in abundance after disturbances,  
 192 and red arrow highlights coral species that decreased in abundance after disturbances.

193 Green box signifies gobies that did not change their preferred host until after  
194 heatwaves.

195  
196 After the two cyclones, there was little change in preferred host, suggesting that  
197 cyclones did not alter host specificity<sup>23</sup> (Fig 3). However after heatwaves, gobies shifted  
198 their host use, and often this shift mirrored the change in coral community. Many gobies  
199 switched from the previously popular *A. nasuta* to the newly abundant *A. cerealis* (Fig  
200 1,3). Out of the remaining goby species post-disturbances, *Gobiodon aoyagii* began  
201 occupying *A. tenuis* and *A. cerealis* each 25% of the time, *G. histrio* switched to occupying  
202 the newly abundant *A. cerealis* 60% of the time, and three others (*G. brochus*, *G.*  
203 *erythrospilus*, and *G. rivulatus*) were also found more often in *A. cerealis* than previously  
204 observed (at least 20% of the time). The occupation of any particular host coral was not  
205 above 45% for any goby species after heatwaves, except for *G. histrio*.

206  
207 Three years post-disturbances, there was little change in the number of hosts occupied  
208 by each goby species, but the majority of gobies were primarily occupying *A. cerealis* as  
209 it was the most abundant (Fig 1,3). *Gobiodon axillaris* was observed once again but  
210 switched host to *A. cerealis* 65% of the time (Fig 2,3). For *G. histrio* and *G. erythrospilus*,  
211 their preferred host was *A. cerealis* (75, 70% respectively), others like *G. brochus* used *A.*  
212 *cerealis* albeit to a lesser extent (30%), and *G. quinquestrigatus* used *A. cerealis* (35%)  
213 and *A. selago* (30%). Accordingly, even three years post-disturbances, most gobies used  
214 *A. cerealis* over other coral species (Fig 3).

## 215 216 **Discussion**

217  
218 As multiple disturbances are becoming the norm, we find that mutualisms on coral reefs  
219 may not respond as a collective unit. Our 7-year study shows that *Acropora* corals are  
220 faring better than their goby inhabitants (genus *Gobiodon*) 3 years after back-to-back  
221 climatic events (2 cyclones and 2 heatwaves)<sup>23</sup>. Right after disturbances, populations of  
222 corals and gobies were each devastated, but gobies declined at least three times more  
223 than corals and most corals were devoid of gobies<sup>23</sup>. After 3 years of recovery time,  
224 coral hosts became twice as abundant and speciose compared to pre-disturbances,  
225 although coral sizes were three times smaller than pre-disturbances. Reduced  
226 competition for space among corals may have allowed a surge in abundances within a  
227 few years of recovery, although they also had to compete with fast growing algae and  
228 high incidences of corallivory<sup>24,25</sup>. For gobies though, half of the goby species became  
229 rare or absent 3-years post-disturbances, and there were four times fewer adult gobies  
230 compared to pre-disturbances. In addition, these gobies were living singly, which  
231 suggested low turnover rates since gobies need to live in pairs to reproduce<sup>26</sup>. Since  
232 corals remained very small, gobies may have been unable to pair and breed as they need  
233 larger corals to do so<sup>27</sup>. As such, gobies may be facing a population bottleneck<sup>28</sup> due to  
234 the inability to form pairs over multiple years. Alarming, 75% of corals no longer  
235 hosted gobies post-disturbances compared to just 5% pre-disturbances<sup>23</sup>. Even with 3  
236 years of recovery time, 75% of corals were still devoid of gobies. Such a lag in goby  
237 resilience is dire for the mutualism of corals and gobies.

238  
239 Given that habitat specificity is likely to play a key role in the continued prevalence of  
240 coral and goby symbioses, the fact that gobies shifted their host occupancy is a cause for  
241 concern. Initially, one third of the *Gobiodon* species inhabited just 2-3 host species,  
242 while others occupied a broader range of hosts<sup>16,29</sup>. The disappearance of half of the  
243 goby species mirrored the decline in their preferred coral hosts immediately after

244 cyclones and heatwaves. Thus, despite being an advantage during stable periods, being  
245 a host specialist may be a significant disadvantage during unstable periods, like those  
246 being fraught with multiple environmental disturbances<sup>29,30</sup>. Even more alarmingly,  
247 these specialist species stayed rare or disappeared despite their preferred host species  
248 increasing in abundance 3 years post-disturbances. Although these unoccupied corals  
249 may be able to survive in the short term, a prolonged lack of mutualistic goby partners  
250 may increase their vulnerability to external threats in the long-term since gobies  
251 provide beneficial services to corals<sup>14,18–20,24</sup>. However, it is possible that other goby  
252 species may shift hosts in the short-term, given the host plasticity observed in some  
253 species. Such host shifts may increase coral resilience but potentially decrease goby  
254 fitness, since goby growth rates are higher in their preferred coral species<sup>7,21</sup>. Over the  
255 longer-term, while the capacity for host shifts may promote initial short-term survival  
256 of both partners, the fitness of both gobies and corals may decline over time unless  
257 other coral symbionts fill the symbiont niche<sup>12,15,17</sup>. Given that disturbances are  
258 occurring more frequently than ever before<sup>1,2</sup>, the mutualism between coral hosts and  
259 gobies may not be able to persist after continued disturbances, leaving both organisms  
260 susceptible to additional stress that could even have knock-on effects on ecosystem  
261 stability<sup>1,10,31,32</sup>. Our study is an early warning sign that mutually symbiotic partners  
262 may not recover at similar rates, and while the capacity for plasticity in host occupation  
263 may be key for immediate survival, it may not prove a sustainable strategy for resilience  
264 to future environmental and other stressors.

265

## 266 **Methods**

267

### 268 *Study Location*

269

270 All sampling was completed at reef sites within Lizard Island, Great Barrier Reef,  
271 Queensland, Australia (-14.687264, 145.447039, Suppl. Fig 1). Lizard Island was  
272 affected by four extreme climatic events annually from 2014 to 2017: cyclone Ita  
273 (category 4) in April 2014, cyclone Nathan (category 4) in March 2015, heatwave  
274 causing a mass-bleaching event from March to April 2016, and a second heatwave  
275 causing a mass-bleaching event from February to May 2017. Sites were visited before  
276 these events in February 2014 (n = 18 sites), after the first cyclone in January-February  
277 2015 (n = 16), after the second cyclone in January-February 2016 (n = 19), after both  
278 heatwaves in February-March 2018 (n = 22), and 3 years after the last disturbance in  
279 January-March 2020 (n = 24) (Fig 1A). Not all sites were sampled each year due to  
280 weather conditions and scouring effects of cyclones that left some sites with only bare  
281 rock.

282

### 283 *Sampling Method*

284

285 Surveys were completed at each time point for the presence of *Gobiodon* goby spp.  
286 within *Acropora* coral spp. There were two types of surveys used: (1) in 2014, 2018, and  
287 2020, corals were surveyed 1 m on either side of 30-m transects, and (2) in 2015 and  
288 2016, corals were surveyed 1 m on either side of 4-m cross-transects<sup>23,33</sup>. In addition,  
289 since very few corals were encountered along transects after the four disturbances,  
290 random searches occurred in 2018 and 2020. When a live *Acropora* coral was  
291 encountered, the coral was measured and averaged along its width, length, and height<sup>34</sup>.  
292 Only corals at least 7 cm in average diameter were included in surveys, because smaller  
293 corals were never found occupied by gobies<sup>23</sup>. The coral was searched for a *Gobiodon*  
294 species using a bright torch light (Bigblue AL1200NP), and the species and number of

295 individuals were noted. Individuals were identified as adults or juveniles based on  
296 coloration and size. The study was completed under the animal ethics protocols AE1404  
297 and AE1725 from the University of Wollongong, and research permits G13/36197.1,  
298 G15/37533.1 and G18/41020.1 issued by the Great Barrier Reef Marine Park Authority.  
299

### 300 *Data analysis*

301  
302 For changes in coral and goby populations, we used data from transects only since  
303 random searches did not follow any particular transect techniques. The following  
304 variables had many zero data points per transect after multiple disturbances, and  
305 accordingly were compared among survey yr (fixed factor) and site (random factor)  
306 with a generalized linear mixed model (GLMER: poisson family) using a zero-inflated  
307 model: coral richness and abundance, adult goby richness and abundance, and juvenile  
308 goby richness and abundance. Note: for all abundance variables, only line transects in  
309 2014, 2018, and 2020 were used to remove transect type bias in abundances. The  
310 following variables were compared among survey yr (fixed factor) and site (random  
311 factor) with linear mixed models (LMER): average coral diameter, coral occupancy  
312 (whether occupied or unoccupied by *Gobiodon* spp.), and adult goby group size  
313 (juveniles were not included because they were observed moving between coral heads).  
314 All analyses were completed in R (v3.5.2)<sup>35</sup> with the following packages: tidyverse<sup>36</sup>,  
315 lme4<sup>37</sup>, lmerTest<sup>38</sup>, LMERConvenienceFunctions<sup>39</sup>, piecewiseSEM<sup>40</sup>, glmmTMB<sup>41</sup>,  
316 emmeans<sup>42</sup>, DHARMA<sup>43</sup>, and performance<sup>44</sup>. Coral and goby communities for the 10  
317 most common species of each genus were compared among survey yr (fixed factor) and  
318 site (random factor) with a permutational analysis of variance (PERMANOVA) in  
319 Primer-E software (v7).  
320

321 For host specificity analyses, we used data from transects and random searches. Data  
322 for particular species were removed for years in which the species was observed less  
323 than 8 times in order to allow for enough observations to assess host specificity use.  
324 Three out of the 13 goby species observed in the surveys were excluded for host  
325 specificity analysis since they were consistently too rare (*G. citrinus*, *G. okinawae*, and *G.*  
326 *sp. D*). The corals inhabited per goby species were then combined within current zones  
327 per year. Coral species inhabited were compared among goby species (fixed factor) and  
328 survey yr (fixed factor) using PERMANOVA. The following covariable was added to the  
329 analysis which was calculated from the first survey pre-disturbances (2014): specificity  
330 continuum (proportion of occurrences in which only one coral species was used per  
331 goby species [continuous variable, 0-1]). PERMANOVAs were repeated (without the  
332 covariable as it is correlated with the following factors) to individually include each of  
333 the following explanatory factors calculated from the first survey pre-disturbances  
334 (2014): coral richness specificity (fixed factor, host specificity category per goby species  
335 on the basis that goby conspecifics used up to 3 coral species [specialist] versus more  
336 than 3 coral species [generalist]), proportional coral specificity (fixed factor, host  
337 specificity category per goby species on the basis that 75% or more goby conspecifics  
338 used a single coral species [specialist] versus less than 75% of gobies used a single coral  
339 species [generalist]), and sociality index of each goby species (fixed factor: asocial or  
340 social as calculated in Hing et al., 2018). Note: the goby species factor was nested within  
341 each of the factors in the later PERMANOVAs.  
342



343 **References**

344

345 1. Turner, M. G. Disturbance and landscape dynamics in a changing world. *Ecology* **91**,

346 2833–2849 (2010).

347 2. Hughes, T. P. *et al.* Spatial and temporal patterns of mass bleaching of corals in the

348 Anthropocene. *Science* **359**, 80–83 (2018).

349 3. Angelini, C., Altieri, A. H., Silliman, B. R. & Bertness, M. D. Interactions among

350 Foundation Species and Their Consequences for Community Organization,

351 Biodiversity, and Conservation. *BioScience* **61**, 782–789 (2011).

352 4. Denton, J. A. & Gokhale, C. S. Synthetic mutualism and the intervention dilemma. *Life*

353 **9**, 15 (2019).

354 5. de Fouw, J. *et al.* Drought, mutualism breakdown, and landscape-scale degradation

355 of seagrass beds. *Curr. Biol.* **26**, 1051–1056 (2016).

356 6. Marquis, M., Toro, I. D. & Pelini, S. L. Insect mutualisms buffer warming effects on

357 multiple trophic levels. *Ecology* **95**, 9–13 (2014).

358 7. Munday, P. L. Fitness consequences of habitat use and competition among coral-

359 dwelling fishes. *Oecologia* **128**, 585–593 (2001).

360 8. Hughes, J. B., Daily, G. C. & Ehrlich, P. R. Conservation of Insect Diversity: A Habitat

361 Approach. *Conserv. Biol.* **14**, 1788–1797 (2000).

362 9. Douglas, A. E. Host benefit and the evolution of specialization in symbiosis. *Heredity*

363 **81**, 599–603 (1998).

364 10. Kiers, E. T., Palmer, T. M., Ives, A. R., Bruno, J. F. & Bronstein, J. L. Mutualisms in a

365 changing world: an evolutionary perspective. *Ecol. Lett.* **13**, 1459–1474 (2010).

366 11. Sensenig, R. L. *et al.* Fire disturbance disrupts an acacia ant–plant mutualism in favor

367 of a subordinate ant species. *Ecology* **98**, 1455–1464 (2017).

- 368 12. Bonin, M. C. Specializing on vulnerable habitat: *Acropora* selectivity among  
369 damselfish recruits and the risk of bleaching-induced habitat loss. *Coral Reefs* **31**,  
370 287–297 (2012).
- 371 13. Pratchett, M. S., Messmer, V. & Wilson, S. K. Size-specific recolonization success by  
372 coral-dwelling damselfishes moderates resilience to habitat loss. *Sci. Rep.* **10**, 17016  
373 (2020).
- 374 14. Chase, T. J., Pratchett, M. S., Frank, G. E. & Hoogenboom, M. O. Coral-dwelling fish  
375 moderate bleaching susceptibility of coral hosts. *PLoS ONE* **13**, e0208545 (2018).
- 376 15. McKeon, C. S., Stier, A. C., McIlroy, S. E. & Bolker, B. M. Multiple defender effects:  
377 synergistic coral defense by mutualist crustaceans. *Oecologia* **169**, 1095–1103  
378 (2012).
- 379 16. Munday, P. L., Harold, A. S. & Winterbottom, R. Guide to coral-dwelling gobies, genus  
380 *Gobiodon* (Gobiidae), from Papua New Guinea and the Great Barrier Reef. *Rev. Fr.*  
381 *Aquariol.* **26**, 53–58 (1999).
- 382 17. Thompson, J. R., Rivera, H. E., Closek, C. J. & Medina, M. Microbes in the coral  
383 holobiont: partners through evolution, development, and ecological interactions.  
384 *Front. Cell. Infect. Microbiol.* **4**, 176 (2015).
- 385 18. Chase, T. J. *et al.* Damselfishes alleviate the impacts of sediments on host corals. *R.*  
386 *Soc. Open Sci.* **7**, 192074 (2020).
- 387 19. Dirnwoeber, M. & Herler, J. Toxic coral gobies reduce the feeding rate of a  
388 corallivorous butterflyfish on *Acropora* corals. *Coral Reefs* **32**, 91–100 (2013).
- 389 20. Dixson, D. L. & Hay, M. E. Corals chemically cue mutualistic fishes to remove  
390 competing seaweeds. *Science* **338**, 804–807 (2012).
- 391 21. Caley, M. J. & Munday, P. L. Growth trades off with habitat specialization. *Proc. R. Soc.*  
392 *B Biol. Sci.* **270**, S175–S177 (2003).

- 393 22. Hughes, T. P. *et al.* Global warming impairs stock–recruitment dynamics of corals.  
394 *Nature* **568**, 387–390 (2019).
- 395 23. Froehlich, C. Y. M., Klanten, O. S., Hing, M. L., Downton, M. & Wong, M. Y. L. Uneven  
396 declines between corals and cryptobenthic fish symbionts from multiple  
397 disturbances. *Sci. Rep.* **11**, 16420 (2021).
- 398 24. Penin, L. *et al.* Early post-settlement mortality and the structure of coral  
399 assemblages. *Mar. Ecol. Prog. Ser.* **408**, 55–64 (2010).
- 400 25. Baird, A. H. & Hughes, T. P. Competitive dominance by tabular corals: an  
401 experimental analysis of recruitment and survival of understorey assemblages. *J.*  
402 *Exp. Mar. Biol. Ecol.* **251**, 117–132 (2000).
- 403 26. Wong, M. Y. L. & Buston, P. M. Social systems in habitat-specialist reef fishes: key  
404 concepts in evolutionary ecology. *BioScience* **63**, 453–463 (2013).
- 405 27. Kuwamura, T., Nakashima, Y. & Yogo, Y. Plasticity in size and age at maturity in a  
406 monogamous fish: effect of host coral size and frequency dependence. *Behav. Ecol.*  
407 *Sociobiol.* **38**, 365–370 (1996).
- 408 28. Sergio, F., Blas, J. & Hiraldo, F. Animal responses to natural disturbance and climate  
409 extremes: a review. *Glob. Planet. Change* **161**, 28–40 (2018).
- 410 29. Munday, P. L. Interactions between habitat use and patterns of abundance in coral-  
411 dwelling fishes of the genus *Gobiodon*. *Environ. Biol. Fishes* **58**, 355–369 (2000).
- 412 30. Feary, D. A. The influence of resource specialization on the response of reef fish to  
413 coral disturbance. *Mar. Biol.* **153**, 153–161 (2007).
- 414 31. Six, D. L. *et al.* Anthropogenic effects on interaction outcomes: examples from insect-  
415 microbial symbioses in forest and savanna ecosystems. *Symbiosis* **53**, 101–121  
416 (2011).

- 417 32. Wilson, S. K., Graham, N. A. J., Pratchett, M. S., Jones, G. P. & Polunin, N. V. C. Multiple  
418 disturbances and the global degradation of coral reefs: are reef fishes at risk or  
419 resilient? *Glob. Change Biol.* **12**, 2220–2234 (2006).
- 420 33. Hing, M. L., Klanten, O. S., Dowton, M., Brown, K. R. & Wong, M. Y. L. Repeated cyclone  
421 events reveal potential causes of sociality in coral-dwelling *Gobiodon* fishes. *PLoS*  
422 *ONE* **13**, e0202407 (2018).
- 423 34. Kuwamura, T., Yogo, Y. & Nakashima, Y. Population dynamics of goby *Paragobiodon*  
424 *echinocephalus* and host coral *Stylophora pistillata*. *Mar. Ecol. Prog. Ser.* **103**, 17–23  
425 (1994).
- 426 35. R Core Team. R: a language and environment for statistical computing. *R Foundation*  
427 *for Statistical Computing*. Vienna, Austria. <https://www.R-project.org> (2018).
- 428 36. Wickham, H. *et al.* Welcome to the Tidyverse. *J. Open Source Softw.* **4**, 1686 (2019).
- 429 37. Bates, D., Mächler, M., Bolker, B. & Walker, S. Fitting linear mixed-effects models  
430 using lme4. *J. Stat. Softw.* **67**, 1–48 (2015).
- 431 38. Kuznetsova, A., Brockhoff, P. B. & Christensen, R. H. B. lmerTest package: tests in  
432 linear mixed effects models. *J. Stat. Softw.* **82**, 1–26 (2017).
- 433 39. Tremblay, A. & Ransijn, J. LMERConvenienceFunctions-package: model selection and  
434 post-hoc analysis for (G)LMER Models. *R Package* v3.0 ed2020.
- 435 40. Lefcheck, J. S. piecewiseSEM: piecewise structural equation modelling in R for  
436 ecology, evolution, and systematics. *Methods Ecol. Evol.* **7**, 573–579 (2016).
- 437 41. Brooks, M. E. *et al.* Modeling zero-inflated count data with glmmTMB. *bioRxiv*  
438 132753 (2017) doi:10.1101/132753.
- 439 42. Lenth, R. V. *et al.* Emmeans package: estimated marginal means, aka least-squares  
440 means. *R Package* v1.4.7 ed2020 (2020).
- 441 43. Hartig, F. & Lohse, L. DHARMA package: residual diagnostics for hierarchical (multi-  
442 level/mixed) regression models. *R Package* 0.3.3.0 ed2020.

- 443 44. Lüdecke, D., Ben-Shachar, M. S., Patil, I., Waggoner, P. & Makowski, D. Assessment,  
444 testing and comparison of statistical models using R. *Journal of Open Source Software*  
445 vol. 6 3112 (2021).  
446
